# Supplementary material for: Regulation of Serum Amyloid A3 (SAA3) in Mouse Colonic Epithelium and Adipose Tissue by the Intestinal Microbiota
Source: PLoS One. 2009 Jun 9;4(6):e5842. doi: 10.1371/journal.pone.0005842 (PMC2688757; doi:10.1371/journal.pone.0005842)
Supplement: Table S1 — (0.01 MB PDF) [file pone.0005842.s004.pdf]

**Table S1.** Mouse and Human SAA Coding Sequence Alignments

**MOUSE (mSAA) AND HUMAN (hSAA) CODING SEQUENCES**

|         | CCDS         | NCBI protein ID            | Protein (aa) |
|---------|--------------|----------------------------|--------------|
| mSAA1   | CCDS 21284.1 | NP_033143.1                | 122          |
| mSAA2   | CCDS 21285.1 | NP_035444.1                | 122          |
| mSAA3   | CCDS 21282.1 | NP_035445.1                | 122          |
| mSAA4   | CCDS 21283.1 | NP_035446.1                | 130          |
| hSAA1*  | CCDS 7835.1  | NP_000322.2<br>NP_954630.1 | 122          |
| hSAA2   | CCDS 7833.1  | NP_110381.2                | 122          |
| hSAA3** | n/a          | AAO48437.1                 | 60           |
| hSAA4   | CCDS 7832.1  | NP_006503.1                | 130          |

\*transcript variants identified (same predicted CDS)

\*\*no consensus transcript in CCDS database, comparisons use product of an identified sequence variant

**BLAST ALIGNMENT REGIONS: MOUSE SAA ISOFORMS AGAINST HUMAN SAA ISOFORMS**

|       | hSAA1  | hSAA2  | hSAA3 | hSAA4  |
|-------|--------|--------|-------|--------|
| mSAA1 | 88/122 | 85/122 | 27/48 | 68/130 |
| mSAA2 | 88/122 | 85/122 | 26/48 | 68/130 |
| mSAA3 | 86/122 | 74/96  | 31/48 | 67/130 |
| mSAA4 | 71/130 | 56/104 | 27/52 | 75/130 |

**PERCENT IDENTITY ACROSS ENTIRE CODING SEQUENCE\*\*\***

|       | hSAA1 | hSAA2 | hSAA3 | hSAA4 |
|-------|-------|-------|-------|-------|
| mSAA1 | 72    | 70    | 22    | 52    |
| mSAA2 | 72    | 70    | 21    | 52    |
| mSAA3 | 70    | 61    | 25    | 52    |
| mSAA4 | 55    | 43    | 21    | 58    |

**Default BLASTP settings:**

Matrix: BLOSUM62; gap open: 11; gap extension: 1; x\_dropoff: 0; expect 10; wordsize: 3

\*\*\* Percent identity is calculated as: 
$$\frac{100 \times (\text{the number of amino acids that align using default BLAST parameters})}{(\text{the total number of amino acids in the longest isoform in that comparison})}$$
